# Supplementary material for: Polyphenol Microbial Metabolites Exhibit Gut and Blood–Brain Barrier Permeability and Protect Murine Microglia against LPS-Induced Inflammation
Source: PubMed Central journal article supplement (PMC6523162; doi:10.3390/metabo9040078), 2019-04-19
Supplement: metabolites-09-00078-s001.pdf [file metabolites-09-00078-s001.pdf]

## Supplementary Material

# Polyphenol microbial metabolites exhibit gut and blood-brain barrier permeability and protect murine microglia against LPS-induced inflammation

Shelby L. Johnson<sup>1,2</sup>, Riley D. Kirk<sup>2</sup>, Nicholas A. DaSilva<sup>2</sup>, Hang Ma<sup>1,2</sup>, Navindra P. Seeram<sup>1,2,\*</sup> and Matthew J. Bertin<sup>2,\*</sup>

<sup>1</sup> George and Anne Ryan Institute for Neuroscience, University of Rhode Island, Kingston, RI 02881, USA

<sup>2</sup> Department of Biomedical and Pharmaceutical Sciences, College of Pharmacy, University of Rhode Island, Kingston, RI 02881, USA

\* Correspondence: [nseeram@uri.edu](mailto:nseeram@uri.edu), Tel. 401-874-9367 (N.P.S.); [mbertin@uri.edu](mailto:mbertin@uri.edu), Tel.: 401-874-5016 (M.J.B.)

Received: date; Accepted: date; Published: date

**Table S1.** Effect of isoflavones (GEN, DAI, EQ) on NOS production. One-way ANOVA followed by Tukey's multiple comparison procedure. GEN 20  $\mu$ M comparisons in bold.

| Tukey's multiple comparisons test                                | Mean Diff.    | 95.00% CI of diff.      | Significant? | Summary     | Adjusted P Value  |
|------------------------------------------------------------------|---------------|-------------------------|--------------|-------------|-------------------|
| Control vs. LPS (1 $\mu$ g/mL)                                   | -36.28        | -43.18 to -29.38        | Yes          | ****        | <0.0001           |
| Control vs. GEN (20 $\mu$ M)                                     | -10.11        | -17.27 to -2.941        | Yes          | **          | 0.0011            |
| Control vs. GEN (10 $\mu$ M)                                     | -21.87        | -29.04 to -14.7         | Yes          | ****        | <0.0001           |
| Control vs. DAI (20 $\mu$ M)                                     | -27.05        | -34.22 to -19.89        | Yes          | ****        | <0.0001           |
| Control vs. DAI (10 $\mu$ M)                                     | -32.15        | -39.31 to -24.98        | Yes          | ****        | <0.0001           |
| Control vs. EQ (20 $\mu$ M)                                      | -27.81        | -34.97 to -20.64        | Yes          | ****        | <0.0001           |
| Control vs. EQ (10 $\mu$ M)                                      | -30.06        | -37.23 to -22.9         | Yes          | ****        | <0.0001           |
| LPS (1 $\mu$ g/mL) vs. GEN (20 $\mu$ M)                          | 26.17         | 18.64 to 33.7           | Yes          | ****        | <0.0001           |
| LPS (1 $\mu$ g/mL) vs. GEN (10 $\mu$ M)                          | 14.41         | 6.88 to 21.93           | Yes          | ****        | <0.0001           |
| LPS (1 $\mu$ g/mL) vs. DAI (20 $\mu$ M)                          | 9.223         | 1.697 to 16.75          | Yes          | **          | 0.0069            |
| LPS (1 $\mu$ g/mL) vs. DAI (10 $\mu$ M)                          | 4.129         | -3.397 to 11.66         | No           | ns          | 0.6667            |
| LPS (1 $\mu$ g/mL) vs. EQ (20 $\mu$ M)                           | 8.47          | 0.9441 to 16            | Yes          | *           | 0.0173            |
| LPS (1 $\mu$ g/mL) vs. EQ (10 $\mu$ M)                           | 6.216         | -1.311 to 13.74         | No           | ns          | 0.1766            |
| <b>GEN (20 <math>\mu</math>M) vs. GEN (10 <math>\mu</math>M)</b> | <b>-11.76</b> | <b>-19.54 to -3.991</b> | <b>Yes</b>   | <b>***</b>  | <b>0.0004</b>     |
| <b>GEN (20 <math>\mu</math>M) vs. DAI (20 <math>\mu</math>M)</b> | <b>-16.95</b> | <b>-24.72 to -9.174</b> | <b>Yes</b>   | <b>****</b> | <b>&lt;0.0001</b> |
| <b>GEN (20 <math>\mu</math>M) vs. DAI (10 <math>\mu</math>M)</b> | <b>-22.04</b> | <b>-29.81 to -14.27</b> | <b>Yes</b>   | <b>****</b> | <b>&lt;0.0001</b> |
| <b>GEN (20 <math>\mu</math>M) vs. EQ (20 <math>\mu</math>M)</b>  | <b>-17.7</b>  | <b>-25.47 to -9.927</b> | <b>Yes</b>   | <b>****</b> | <b>&lt;0.0001</b> |
| <b>GEN (20 <math>\mu</math>M) vs. EQ (10 <math>\mu</math>M)</b>  | <b>-19.95</b> | <b>-27.73 to -12.18</b> | <b>Yes</b>   | <b>****</b> | <b>&lt;0.0001</b> |
| GEN (10 $\mu$ M) vs. DAI (20 $\mu$ M)                            | -5.184        | -12.96 to 2.59          | No           | ns          | 0.425             |
| GEN (10 $\mu$ M) vs. DAI (10 $\mu$ M)                            | -10.28        | -18.05 to -2.504        | Yes          | **          | 0.0027            |
| GEN (10 $\mu$ M) vs. EQ (20 $\mu$ M)                             | -5.936        | -13.71 to 1.837         | No           | ns          | 0.2577            |
| GEN (10 $\mu$ M) vs. EQ (10 $\mu$ M)                             | -8.191        | -15.96 to -0.418        | Yes          | *           | 0.0322            |
| DAI (20 $\mu$ M) vs. DAI (10 $\mu$ M)                            | -5.094        | -12.87 to 2.679         | No           | ns          | 0.4477            |

|                                      |         |                 |    |    |         |
|--------------------------------------|---------|-----------------|----|----|---------|
| DAI (20 $\mu$ M) vs. EQ (20 $\mu$ M) | -0.7528 | -8.526 to 7.02  | No | ns | >0.9999 |
| DAI (20 $\mu$ M) vs. EQ (10 $\mu$ M) | -3.008  | -10.78 to 4.766 | No | ns | 0.9217  |
| DAI (10 $\mu$ M) vs. EQ (20 $\mu$ M) | 4.341   | -3.432 to 12.11 | No | ns | 0.6467  |
| DAI (10 $\mu$ M) vs. EQ (10 $\mu$ M) | 2.086   | -5.687 to 9.859 | No | ns | 0.9893  |
| EQ (20 $\mu$ M) vs. EQ (10 $\mu$ M)  | -2.255  | -10.03 to 5.518 | No | ns | 0.9832  |

**Table S2.** Effect of isoflavones (GEN, DAI, EQ) on TNF- $\alpha$  concentration. One-way ANOVA followed by Tukey's multiple comparison procedure. GEN 20  $\mu$ M comparisons in bold.

| Tukey's multiple comparisons test                                | Mean Diff.    | 95.00% CI of diff.      | Significant? | Summary     | Adjusted P Value  |
|------------------------------------------------------------------|---------------|-------------------------|--------------|-------------|-------------------|
| Control vs. LPS (1 $\mu$ g/mL)                                   | -572.2        | -608.4 to -536          | Yes          | ****        | <0.0001           |
| Control vs. EST (20 $\mu$ M)                                     | -539.1        | -581.6 to -496.7        | Yes          | ****        | <0.0001           |
| Control vs. EST (10 $\mu$ M)                                     | -545.6        | -588.1 to -503.1        | Yes          | ****        | <0.0001           |
| Control vs. GEN (20 $\mu$ M)                                     | -372.4        | -414.9 to -330          | Yes          | ****        | <0.0001           |
| Control vs. GEN (10 $\mu$ M)                                     | -458.4        | -500.9 to -415.9        | Yes          | ****        | <0.0001           |
| Control vs. DAI (20 $\mu$ M)                                     | -501.7        | -544.1 to -459.2        | Yes          | ****        | <0.0001           |
| Control vs. DAI (10 $\mu$ M)                                     | -514.3        | -556.8 to -471.9        | Yes          | ****        | <0.0001           |
| Control vs. EQ (20 $\mu$ M)                                      | -499.5        | -541.9 to -457          | Yes          | ****        | <0.0001           |
| Control vs. EQ (10 $\mu$ M)                                      | -515.2        | -557.7 to -472.7        | Yes          | ****        | <0.0001           |
| LPS (1 $\mu$ g/mL) vs. EST (20 $\mu$ M)                          | 33.1          | -9.363 to 75.55         | No           | ns          | 0.2428            |
| LPS (1 $\mu$ g/mL) vs. EST (10 $\mu$ M)                          | 26.62         | -15.84 to 69.08         | No           | ns          | 0.5312            |
| LPS (1 $\mu$ g/mL) vs. GEN (20 $\mu$ M)                          | 199.8         | 157.3 to 242.2          | Yes          | ****        | <0.0001           |
| LPS (1 $\mu$ g/mL) vs. GEN (10 $\mu$ M)                          | 113.8         | 71.38 to 156.3          | Yes          | ****        | <0.0001           |
| LPS (1 $\mu$ g/mL) vs. DAI (20 $\mu$ M)                          | 70.55         | 28.09 to 113            | Yes          | ****        | <0.0001           |
| LPS (1 $\mu$ g/mL) vs. DAI (10 $\mu$ M)                          | 57.91         | 15.46 to 100.4          | Yes          | **          | 0.0019            |
| LPS (1 $\mu$ g/mL) vs. EQ (20 $\mu$ M)                           | 72.78         | 30.32 to 115.2          | Yes          | ****        | <0.0001           |
| LPS (1 $\mu$ g/mL) vs. EQ (10 $\mu$ M)                           | 57.03         | 14.57 to 99.49          | Yes          | **          | 0.0023            |
| <b>GEN (20 <math>\mu</math>M) vs. GEN (10 <math>\mu</math>M)</b> | <b>-85.94</b> | <b>-133.8 to -38.04</b> | <b>Yes</b>   | <b>****</b> | <b>&lt;0.0001</b> |
| <b>GEN (20 <math>\mu</math>M) vs. DAI (20 <math>\mu</math>M)</b> | <b>-129.2</b> | <b>-177.1 to -81.34</b> | <b>Yes</b>   | <b>****</b> | <b>&lt;0.0001</b> |
| <b>GEN (20 <math>\mu</math>M) vs. DAI (10 <math>\mu</math>M)</b> | <b>-141.9</b> | <b>-189.8 to -93.97</b> | <b>Yes</b>   | <b>****</b> | <b>&lt;0.0001</b> |
| <b>GEN (20 <math>\mu</math>M) vs. EQ (20 <math>\mu</math>M)</b>  | <b>-127</b>   | <b>-174.9 to -79.11</b> | <b>Yes</b>   | <b>****</b> | <b>&lt;0.0001</b> |
| <b>GEN (20 <math>\mu</math>M) vs. EQ (10 <math>\mu</math>M)</b>  | <b>-142.8</b> | <b>-190.6 to -94.85</b> | <b>Yes</b>   | <b>****</b> | <b>&lt;0.0001</b> |
| GEN (10 $\mu$ M) vs. DAI (20 $\mu$ M)                            | -43.29        | -91.19 to 4.608         | No           | ns          | 0.1051            |
| GEN (10 $\mu$ M) vs. DAI (10 $\mu$ M)                            | -55.92        | -103.8 to -8.024        | Yes          | *           | 0.0118            |
| GEN (10 $\mu$ M) vs. EQ (20 $\mu$ M)                             | -41.06        | -88.96 to 6.837         | No           | ns          | 0.1464            |
| GEN (10 $\mu$ M) vs. EQ (10 $\mu$ M)                             | -56.81        | -104.7 to -8.906        | Yes          | *           | 0.01              |
| DAI (20 $\mu$ M) vs. DAI (10 $\mu$ M)                            | -12.63        | -60.53 to 35.27         | No           | ns          | 0.9959            |
| DAI (20 $\mu$ M) vs. EQ (20 $\mu$ M)                             | 2.229         | -45.67 to 50.13         | No           | ns          | >0.9999           |
| DAI (20 $\mu$ M) vs. EQ (10 $\mu$ M)                             | -13.51        | -61.41 to 34.39         | No           | ns          | 0.9933            |
| DAI (10 $\mu$ M) vs. EQ (20 $\mu$ M)                             | 14.86         | -33.04 to 62.76         | No           | ns          | 0.987             |
| DAI (10 $\mu$ M) vs. EQ (10 $\mu$ M)                             | -0.8819       | -48.78 to 47.02         | No           | ns          | >0.9999           |
| EQ (20 $\mu$ M) vs. EQ (10 $\mu$ M)                              | -15.74        | -63.64 to 32.16         | No           | ns          | 0.9808            |

**Table S3.** Effect of isoflavones (GEN, DAI, EQ) on IL-6 concentration. One-way ANOVA followed by Tukey's multiple comparison procedure. GEN 20  $\mu$ M comparisons in bold.

| Tukey's multiple comparisons test                                | Mean Diff.    | 95.00% CI of diff.      | Significant? | Summary     | Adjusted P Value  |
|------------------------------------------------------------------|---------------|-------------------------|--------------|-------------|-------------------|
| Control vs. LPS (1 $\mu$ g/mL)                                   | -103.1        | -112.4 to -93.84        | Yes          | ****        | <0.0001           |
| Control vs. EST (20 $\mu$ M)                                     | -83.66        | -94.53 to -72.8         | Yes          | ****        | <0.0001           |
| Control vs. EST (10 $\mu$ M)                                     | -89.07        | -99.94 to -78.21        | Yes          | ****        | <0.0001           |
| Control vs. GEN (20 $\mu$ M)                                     | -19.72        | -30.59 to -8.858        | Yes          | ****        | <0.0001           |
| Control vs. GEN (10 $\mu$ M)                                     | -67.96        | -78.82 to -57.09        | Yes          | ****        | <0.0001           |
| Control vs. DAI (20 $\mu$ M)                                     | -82.42        | -93.29 to -71.56        | Yes          | ****        | <0.0001           |
| Control vs. DAI (10 $\mu$ M)                                     | -85.84        | -96.71 to -74.98        | Yes          | ****        | <0.0001           |
| Control vs. EQ (20 $\mu$ M)                                      | -83.63        | -94.49 to -72.76        | Yes          | ****        | <0.0001           |
| Control vs. EQ (10 $\mu$ M)                                      | -92.72        | -103.6 to -81.85        | Yes          | ****        | <0.0001           |
| LPS (1 $\mu$ g/mL) vs. EST (20 $\mu$ M)                          | 19.44         | 8.575 to 30.31          | Yes          | ****        | <0.0001           |
| LPS (1 $\mu$ g/mL) vs. EST (10 $\mu$ M)                          | 14.03         | 3.169 to 24.9           | Yes          | **          | 0.0037            |
| LPS (1 $\mu$ g/mL) vs. GEN (20 $\mu$ M)                          | 83.38         | 72.52 to 94.25          | Yes          | ****        | <0.0001           |
| LPS (1 $\mu$ g/mL) vs. GEN (10 $\mu$ M)                          | 35.15         | 24.28 to 46.01          | Yes          | ****        | <0.0001           |
| LPS (1 $\mu$ g/mL) vs. DAI (20 $\mu$ M)                          | 20.68         | 9.818 to 31.55          | Yes          | ****        | <0.0001           |
| LPS (1 $\mu$ g/mL) vs. DAI (10 $\mu$ M)                          | 17.26         | 6.397 to 28.13          | Yes          | ***         | 0.0002            |
| LPS (1 $\mu$ g/mL) vs. EQ (20 $\mu$ M)                           | 19.48         | 8.614 to 30.34          | Yes          | ****        | <0.0001           |
| LPS (1 $\mu$ g/mL) vs. EQ (10 $\mu$ M)                           | 10.39         | -0.4786 to 21.25        | No           | ns          | 0.0709            |
| <b>GEN (20 <math>\mu</math>M) vs. GEN (10 <math>\mu</math>M)</b> | <b>-48.23</b> | <b>-60.49 to -35.98</b> | <b>Yes</b>   | <b>****</b> | <b>&lt;0.0001</b> |
| <b>GEN (20 <math>\mu</math>M) vs. DAI (20 <math>\mu</math>M)</b> | <b>-62.7</b>  | <b>-74.96 to -50.44</b> | <b>Yes</b>   | <b>****</b> | <b>&lt;0.0001</b> |
| <b>GEN (20 <math>\mu</math>M) vs. DAI (10 <math>\mu</math>M)</b> | <b>-66.12</b> | <b>-78.38 to -53.86</b> | <b>Yes</b>   | <b>****</b> | <b>&lt;0.0001</b> |
| <b>GEN (20 <math>\mu</math>M) vs. EQ (20 <math>\mu</math>M)</b>  | <b>-63.9</b>  | <b>-76.16 to -51.64</b> | <b>Yes</b>   | <b>****</b> | <b>&lt;0.0001</b> |
| <b>GEN (20 <math>\mu</math>M) vs. EQ (10 <math>\mu</math>M)</b>  | <b>-72.99</b> | <b>-85.25 to -60.74</b> | <b>Yes</b>   | <b>****</b> | <b>&lt;0.0001</b> |
| GEN (10 $\mu$ M) vs. DAI (20 $\mu$ M)                            | -14.46        | -26.72 to -2.207        | Yes          | *           | 0.0106            |
| GEN (10 $\mu$ M) vs. DAI (10 $\mu$ M)                            | -17.89        | -30.14 to -5.628        | Yes          | ***         | 0.0007            |
| GEN (10 $\mu$ M) vs. EQ (20 $\mu$ M)                             | -15.67        | -27.93 to -3.411        | Yes          | **          | 0.0042            |
| GEN (10 $\mu$ M) vs. EQ (10 $\mu$ M)                             | -24.76        | -37.02 to -12.5         | Yes          | ****        | <0.0001           |
| DAI (20 $\mu$ M) vs. DAI (10 $\mu$ M)                            | -3.421        | -15.68 to 8.837         | No           | ns          | 0.9938            |
| DAI (20 $\mu$ M) vs. EQ (20 $\mu$ M)                             | -1.204        | -13.46 to 11.05         | No           | ns          | >0.9999           |
| DAI (20 $\mu$ M) vs. EQ (10 $\mu$ M)                             | -10.3         | -22.55 to 1.961         | No           | ns          | 0.1647            |
| DAI (10 $\mu$ M) vs. EQ (20 $\mu$ M)                             | 2.216         | -10.04 to 14.47         | No           | ns          | 0.9998            |
| DAI (10 $\mu$ M) vs. EQ (10 $\mu$ M)                             | -6.876        | -19.13 to 5.382         | No           | ns          | 0.6755            |
| EQ (20 $\mu$ M) vs. EQ (10 $\mu$ M)                              | -9.092        | -21.35 to 3.165         | No           | ns          | 0.3028            |

**Table S4.** Effect of lignans (SECO, ED, EL) on NOS production. One-way ANOVA followed by Tukey's multiple comparison procedure. EL 10  $\mu$ M comparisons in bold.

| Tukey's multiple comparisons test                                | Mean Diff.   | 95.00% CI of diff.    | Significant? | Summary     | Adjusted P Value  |
|------------------------------------------------------------------|--------------|-----------------------|--------------|-------------|-------------------|
| Control vs. LPS (1 $\mu$ g/mL)                                   | -39.03       | -42.1 to -35.97       | Yes          | ****        | <0.0001           |
| Control vs. SECO (10 $\mu$ M)                                    | -34.38       | -37.44 to -31.32      | Yes          | ****        | <0.0001           |
| Control vs. ED (10 $\mu$ M)                                      | -34.68       | -37.74 to -31.62      | Yes          | ****        | <0.0001           |
| Control vs. EL (10 $\mu$ M)                                      | -23.7        | -26.76 to -20.64      | Yes          | ****        | <0.0001           |
| LPS (1 $\mu$ g/mL) vs. SECO (10 $\mu$ M)                         | 4.653        | 1.591 to 7.715        | Yes          | **          | 0.0016            |
| LPS (1 $\mu$ g/mL) vs. ED (10 $\mu$ M)                           | 4.354        | 1.292 to 7.417        | Yes          | **          | 0.0031            |
| LPS (1 $\mu$ g/mL) vs. EL (10 $\mu$ M)                           | 15.34        | 12.27 to 18.4         | Yes          | ****        | <0.0001           |
| SECO (10 $\mu$ M) vs. ED (10 $\mu$ M)                            | -0.2985      | -3.361 to 2.764       | No           | ns          | 0.9995            |
| <b>SECO (10 <math>\mu</math>M) vs. EL (10 <math>\mu</math>M)</b> | <b>10.68</b> | <b>7.62 to 13.75</b>  | <b>Yes</b>   | <b>****</b> | <b>&lt;0.0001</b> |
| <b>ED (10 <math>\mu</math>M) vs. EL (10 <math>\mu</math>M)</b>   | <b>10.98</b> | <b>7.919 to 14.04</b> | <b>Yes</b>   | <b>****</b> | <b>&lt;0.0001</b> |

**Table S5.** Effect of lignans (SECO, ED, EL) on TNF- $\alpha$  production. One-way ANOVA followed by Tukey's multiple comparison procedure. EL 10  $\mu$ M comparisons in bold.

| Tukey's multiple comparisons test                                | Mean Diff.   | 95.00% CI of diff.    | Significant? | Summary     | Adjusted P Value  |
|------------------------------------------------------------------|--------------|-----------------------|--------------|-------------|-------------------|
| Control vs. LPS (1 $\mu$ g/mL)                                   | -491.3       | -523.1 to -459.4      | Yes          | ****        | <0.0001           |
| Control vs. SECO (10 $\mu$ M)                                    | -470.7       | -502.5 to -438.8      | Yes          | ****        | <0.0001           |
| Control vs. ED (10 $\mu$ M)                                      | -488.6       | -520.5 to -456.8      | Yes          | ****        | <0.0001           |
| Control vs. EL (10 $\mu$ M)                                      | -338.5       | -370.3 to -306.7      | Yes          | ****        | <0.0001           |
| LPS (1 $\mu$ g/mL) vs. SECO (10 $\mu$ M)                         | 20.62        | -11.21 to 52.44       | No           | ns          | 0.3557            |
| LPS (1 $\mu$ g/mL) vs. ED (10 $\mu$ M)                           | 2.638        | -29.18 to 34.46       | No           | ns          | 0.9992            |
| LPS (1 $\mu$ g/mL) vs. EL (10 $\mu$ M)                           | 152.8        | 120.9 to 184.6        | Yes          | ****        | <0.0001           |
| SECO (10 $\mu$ M) vs. ED (10 $\mu$ M)                            | -17.98       | -49.8 to 13.84        | No           | ns          | 0.4925            |
| <b>SECO (10 <math>\mu</math>M) vs. EL (10 <math>\mu</math>M)</b> | <b>132.1</b> | <b>100.3 to 164</b>   | <b>Yes</b>   | <b>****</b> | <b>&lt;0.0001</b> |
| <b>ED (10 <math>\mu</math>M) vs. EL (10 <math>\mu</math>M)</b>   | <b>150.1</b> | <b>118.3 to 181.9</b> | <b>Yes</b>   | <b>****</b> | <b>&lt;0.0001</b> |

**Table S6.** Effect of lignans (SECO, ED, EL) on IL-6 production. One-way ANOVA followed by Tukey's multiple comparison procedure. EL 10  $\mu$ M comparisons in bold.

| Tukey's multiple comparisons test                                | Mean Diff.   | 95.00% CI of diff.    | Significant? | Summary     | Adjusted P Value  |
|------------------------------------------------------------------|--------------|-----------------------|--------------|-------------|-------------------|
| LPS (1 $\mu$ g/mL) vs. SECO (10 $\mu$ M)                         | -7.108       | -44.93 to 30.72       | No           | ns          | 0.9553            |
| LPS (1 $\mu$ g/mL) vs. ED (10 $\mu$ M)                           | -24.9        | -62.72 to 12.93       | No           | ns          | 0.2958            |
| LPS (1 $\mu$ g/mL) vs. EL (10 $\mu$ M)                           | 175.8        | 138 to 213.6          | Yes          | ****        | <0.0001           |
| SECO (10 $\mu$ M) vs. ED (10 $\mu$ M)                            | -17.79       | -55.61 to 20.03       | No           | ns          | 0.5803            |
| <b>SECO (10 <math>\mu</math>M) vs. EL (10 <math>\mu</math>M)</b> | <b>182.9</b> | <b>145.1 to 220.7</b> | <b>Yes</b>   | <b>****</b> | <b>&lt;0.0001</b> |
| <b>ED (10 <math>\mu</math>M) vs. EL (10 <math>\mu</math>M)</b>   | <b>200.7</b> | <b>162.9 to 238.5</b> | <b>Yes</b>   | <b>****</b> | <b>&lt;0.0001</b> |
